# Supplementary material for: Changing Trends in Paralytic Shellfish Poisonings Reflect Increasing Sea Surface Temperatures and Practices of Indigenous and Recreational Harvesters in British Columbia, Canada
Source: MDPI journal article supplement (doi:10.3390/md19100568), 2021-10-14
Supplement: s1 [file s1]

Table S1. Summary of paralytic shellfish poisoning reports in British Columbia, Canada from 1793-2020

October 2021

| Report # | Date of Consumption | Incubation period range (hr) | No. ill (no. death)                   | Shellfish species consumed                 | Location description <sup>a</sup>                         | Harvest Area-Subarea <sup>a</sup> | Self-harvest or consumer Purchase (detail) | Shellfish sample (location) description: STX result as µg STX-eq 100 g <sup>-1</sup> (date) (area was Closed or Open at time of harvesting)                                   | Probable/confirmed        | Source of info |
|----------|---------------------|------------------------------|---------------------------------------|--------------------------------------------|-----------------------------------------------------------|-----------------------------------|--------------------------------------------|-------------------------------------------------------------------------------------------------------------------------------------------------------------------------------|---------------------------|----------------|
| 1        | 15 Jul 1793         |                              | 3(1)                                  | Mussels                                    | Poison Cove, Mathieson Channel                            | 7-7                               | Self-harvest (fishers)                     |                                                                                                                                                                               | Probable                  | [1]            |
| 2        | 2 May 1942          | 0.5                          | 8(3)                                  | Clams, mussels                             | Dodger Cove, Effingham Inlet, Ucluelet Harbour            | 23-7, 23-11                       | Self-harvest (FN)                          | Mussel (from area): 0.33cm <sup>3</sup> of shellfish flesh killed a mouse in 2-3 minutes (Open)                                                                               | Confirmed                 | [1]            |
| 3        | 23 Oct 1957         |                              | 111(0)                                | Various, including oysters, mussels, clams | Comox area of Strait of Georgia                           | 14-14                             | Self-harvest (locals)                      | Samples (from area): 19,840 mouse units equivalent to 3200 (Oct 24) (Open)                                                                                                    | 61 Confirmed, 50 Probable | [1-4]          |
|          |                     |                              | CATS 1(7)<br>DOGS 2(0)<br>RACOONS (8) |                                            |                                                           |                                   |                                            |                                                                                                                                                                               |                           |                |
| 4        | 26 Jul 1964         | 2.5                          | 7(0)                                  | Butter clams                               | Evinrude Passage, Anger Island                            | 5-16                              | Self-harvest (fishers)                     | Whole butter clams (from area): 1168, clams without necks: 880 (Aug 10). (Closed)                                                                                             | Confirmed                 | [1]            |
| 5        | 31 May 1965         |                              | 4(1)                                  | Cockles                                    | Theodosia Inlet, Malaspina Peninsula                      | 15-4                              | Self-harvest (FN)                          | Leftover cooked cockles: 1120 - 1920<br>Butter clams in area 3840 (Jun 1) (Unknown)                                                                                           | Confirmed                 | [1, 4, 5]      |
| 6        | May 1970            |                              | 2(0)                                  | Butter clams                               | Viner Sound, Gilford Island                               | 12-38                             | Self-harvested (locals)                    | Butter clams (Health Bay, Gilford Island) 4200 µg/100g (Unknown)                                                                                                              | Confirmed                 | [4, 6]         |
| 7        | 20 Nov 1972         | 2-4                          | 20(0)                                 | Manila clams, oysters                      | Barkley Sound                                             | 23-8                              | Self-harvested (tourists)                  | Leftover cooked clams: 2900; raw clams: 2100-4000; raw oysters: 1300-1900 (Closed)                                                                                            | Confirmed                 | [7]            |
| 8        | 11 Jun 1975         | 0.3                          | 1(0) <sup>b</sup>                     | Mussels                                    | Work Channel, Prince Rupert                               | 3-6                               | Self-harvested                             | Mussel (from area): 12000 (Closed)                                                                                                                                            | Confirmed                 | [7, 8]         |
| 9        | Sept 1978           | 0.25                         | 3(0)                                  | Oysters                                    | Fanny Bay, Vancouver Island                               | 14-8                              | Self-harvested (tourists)                  | Leftover smoked oysters: 64 (Unknown)                                                                                                                                         | Probable                  | [7]            |
| 10       | 16 May 1980         | 0.5                          | 7(1)                                  | Butter clams                               | Health Bay, Gilford Island                                | 12-39                             | Self-harvested (FN)                        | Leftover raw butter clams: 8600; cooked butter clams: 3500; raw little neck clams: 2200 (Open)                                                                                | Confirmed                 | [5, 7]         |
| 11       | 17 May 1980         | 12                           | 3(0)                                  | Butter clams                               | Shoal Harbour, Gilford Island                             | 12-39                             | Self-harvested (FN)                        | Leftover raw butter clams: 2200 (Open)                                                                                                                                        | Confirmed                 | [5]            |
| 12       | Dec 1981            |                              | 2(0)                                  | Butter clams                               | Church House                                              | 13-18                             | Self-harvested (locals)                    | Raw clams (from area): 2400 (Open)                                                                                                                                            | Confirmed                 | [7]            |
| 13       | May 1982            | 0.25                         | 5(0)                                  | Mussels                                    | Work Channel, Prince Rupert                               | 3-6                               | Self-harvested (locals)                    | Leftover cooked mussels: 14000; raw: 26000-30000 (Closed, no signs posted)                                                                                                    | Confirmed                 | [7]            |
| 14       | 8 May 1985          | 12                           | 3(0)                                  | Butter clams                               | Port McNeill, Simoom Sound                                | 12-19                             | Self-harvested, (locals)                   | Biomonitored butter clams (from area): 9600 (May 7) (Closed to butter clams, open to other species)                                                                           | Confirmed                 | [6] PC         |
| 15       | 8 May 1985          | Within hours                 | 4(0)                                  | Butter clams                               | Port McNeill, Simoom Sound, north of Echo Bay             | 12-19                             | Self-harvested, (tourists)                 | Biomonitored clams (from area): 9600 (May 7); stomach contents of case 42 µg; no STX detected in stomach contents of 3 cases. (Closed to butter clams, open to other species) | Confirmed                 | [6] PC         |
| 16       | 21 Apr 1987         | 2                            | 1(0)                                  | Butter and littleneck clams.               | Porter's Beach near Wiltshire Road north of Chemainus, BC | 17-6                              | Self-harvested (locals)                    | Leftover clams: 64-68; biomonitored butter clams (from area): 350 (March) (Open)                                                                                              | Probable                  | [9, 10]        |
|          |                     |                              | CATS 1(1)                             | Cats ate black tips of siphons             |                                                           |                                   |                                            |                                                                                                                                                                               |                           |                |

Table S1. Summary of paralytic shellfish poisoning reports in British Columbia, Canada from 1793-2020

October 2021

| Report #   | Date of Consumption | Incubation period range (hr) | No. ill (no. death)   | Shellfish species consumed | Location description <sup>a</sup>      | Harvest Area-Subarea <sup>a</sup> | Self-harvest or consumer Purchase (detail) | Shellfish sample (location) description: STX result as µg STX-eq 100 g <sup>-1</sup> (date) (area was Closed or Open at time of harvesting)                                                                              | Probable/confirmed | Source of info  |
|------------|---------------------|------------------------------|-----------------------|----------------------------|----------------------------------------|-----------------------------------|--------------------------------------------|--------------------------------------------------------------------------------------------------------------------------------------------------------------------------------------------------------------------------|--------------------|-----------------|
| 17         | 10 Oct 1988         | 5                            | 1(0)                  | Oysters                    | Rendunda Sea Farms                     | Unknown                           | Purchased (restaurant)                     | N/A                                                                                                                                                                                                                      | Probable           | PC              |
| 18         | 11 Oct 1988         | 6                            | 3(0)                  | Clams                      | Kitkatla, north of Prince Rupert       | 5-3                               | Self-harvested (FN)                        | Biomonitored clams (from area): 300 (Nov 1) (Closed)                                                                                                                                                                     | Probable           | [11]; PC        |
| 19<br>PETS | 25 Oct 1988         | Between 0.25 -2.5            | 10(0)<br>CATS<br>1(2) | Butter clams               | Edye Pass, Canoe Pass in Prince Rupert | 4-4, 4-8                          | Self-harvested (FN)                        | Leftover clams (from Canoe Pass): 1300-1500; clams (from Edye Passage): 1700; one case 387 µg in gastric fluid and 131 µg in undigested solids (Closed)                                                                  | Confirmed          | [12, 13]        |
| 20         | 9 Apr 1989          | 10                           | 1(0)                  | Rock scallops              | Queen Charlotte City (hospital)        | 2-1                               | Self-harvested                             | N/A (Closed)                                                                                                                                                                                                             | Probable           | PC              |
| 21         | 17 Jun 1989         | 7                            | 8(0)                  | Clams                      | Campbell River (hospital)              | 13-4                              | Self-harvest                               | N/A (Unknown)                                                                                                                                                                                                            | Probable           | PC              |
| 22         | 18 Aug 1989         | Within 1 day                 | 1(0)                  | Little neck clams          | Unknown                                | Unknown                           | Purchased (retail)                         | Same batch clams (from store): not detected (Aug 21) (Unknown)                                                                                                                                                           | Probable           | [14]            |
| 23         | 3 Dec 1989          | 0.25 - 2                     | 6(0)                  | Butter clams               | Flores Island near Hot Spring Cove     | 24-3                              | Self-harvested (FN)                        | Leftover butter clam chowder: 79 in broth; 230 in clam meat (Closed)                                                                                                                                                     | Confirmed          | [15]            |
| PET        | 27 Dec 1989         |                              | 1(0)                  | Scallops                   | -                                      | -                                 | -                                          | -                                                                                                                                                                                                                        |                    |                 |
| 24         | 20 Jun 1991         | 5                            | 2(0)                  | Oysters and                | Baynes Sound                           | 14-8                              | Purchased (retail)                         | N/A (Open)                                                                                                                                                                                                               | Probable           | [16]            |
|            |                     |                              |                       | Crab                       | Knights Inlet                          | 12-29                             | Self-harvested (locals)                    | N/A (Open)                                                                                                                                                                                                               |                    |                 |
| 25         | 20 Apr 1992         | 0.25                         | 2(0)                  | Clams                      | Kingcome Inlet                         | 12-43                             | Self-harvested (fishers)                   | Leftover raw cockles: 6700; butter clams 10,000 (Open, closed the following day)                                                                                                                                         | Confirmed          | [17]            |
| 26         | 7 Oct 1992          | 1                            | 1(0)                  | Pink scallops (whole)      | Egmont, Earle's cove                   | 16-10                             | Self-harvested                             | N/A (Closed)                                                                                                                                                                                                             | Probable           | PC              |
| 27         | 30 Dec 1994         |                              | 1(0)                  | Clams and mussels          | Unknown                                | Unknown                           | Purchased (restaurant)                     | Same batch clams, mussels (from restaurant): <40 (Unknown)                                                                                                                                                               | Probable           | [18]            |
| 28         | 5 Sep 1997          | 3                            | 1(0)                  | East coast mussels         | Nova Scotia                            | -                                 | Purchased (retail)                         | Same batch mussels (4 sacks from store): <44 (Open)                                                                                                                                                                      | Probable           | [19]            |
| PET        | 7 Aug 1997          | 4                            | 1(0)                  | Mussels                    | Galiano Island, Saltspring             | -                                 | -                                          | N/A                                                                                                                                                                                                                      | Probable           | PC              |
| 29         | 11 Oct 1997         | 2                            | 3(0)                  | Pink and spiny scallops    | Canoe Rock, Portland Island (park)     | 18-6                              | Self-harvested (locals)                    | N/A (Closed to all bivalve shellfish due to toxic PSP bloom on Sep 5. No signs posted.)                                                                                                                                  | Confirmed          | [20]            |
| 30         | 16 Oct 1997         |                              | 2(0)                  | Oysters, butter clams      | Kulleet Bay, Ladysmith                 | 17-5                              | Self-harvested (FN)                        | Biomonitored mussels (Coffin Point): >5000 (Oct 13) (Closed, harvest area under prohibition due to toxic bloom.)                                                                                                         | Confirmed          | [21, 22]        |
| 31         | 2 Jan 1998          | 1.5 – 2                      | 8(0)                  | Butter clams               | Coffin Point near Ladysmith            | 17-5, 17-6, 17-7                  | Self-harvested (FN)                        | Biomonitored butter clams (3 different locations in Area 17): 580-810 (early Dec) (Closed, harvest area under prohibition for all bivalve species except littleneck clams, manila clams, and oysters due to toxic bloom) | Confirmed          | [23]            |
| 32         | May 1999            |                              | 2(0)                  | Scallops                   | Herbert Inlet                          | 24-4                              | Self-harvested (employees)                 | N/A (Closed May 20)                                                                                                                                                                                                      | Probable           | [24]; FN0315    |
| 33         | 8 Dec 2002          | 0.5                          | 1(0)                  | Butter clams               | Rivers Inlet, Port McNeill             | 9-6                               | Self-harvested                             | N/A, no testing in area 9 in 2002. (Closed)                                                                                                                                                                              | Probable           | PC; FN1165      |
| 34         | 31 Jul 2003         |                              | 6(0)                  | Mussels                    | Effingham Inlet                        | 23-6                              | Purchased (retail)                         | Leftover mussels: 2100 (Closed)                                                                                                                                                                                          | Confirmed          | [25-27]; FN0517 |

Table S1. Summary of paralytic shellfish poisoning reports in British Columbia, Canada from 1793-2020

October 2021

| Report # | Date of Consumption | Incubation period range (hr) | No. ill (no. death) | Shellfish species consumed | Location description <sup>a</sup>             | Harvest Area-Subarea <sup>a</sup> | Self-harvest or consumer Purchase (detail) | Shellfish sample (location) description: STX result as µg STX-eq 100 g <sup>-1</sup> (date) (area was Closed or Open at time of harvesting)                                                                                                                                                                | Probable/confirmed | Source of info                                 |
|----------|---------------------|------------------------------|---------------------|----------------------------|-----------------------------------------------|-----------------------------------|--------------------------------------------|------------------------------------------------------------------------------------------------------------------------------------------------------------------------------------------------------------------------------------------------------------------------------------------------------------|--------------------|------------------------------------------------|
| 35       | 23 May 2004         |                              | 9(0)                | Clams, cockles             | Porpoise Bay, Sechelt (park)                  | 16-5                              | Self-harvested (campers)                   | N/A in 16-5. Biomonitored mussels (adjacent harvest area 16-6 Storm Bay): 200 (May 21), 1600 (May 16), 3500 (Jun 2) (Closed; no signs posted)                                                                                                                                                              | Probable           | PC; [28] FN0290                                |
| 36       | 5 Jun 2004          | 6                            | 1(0)                | Mussels                    | Unknown                                       | Unknown                           | Purchased (restaurant)                     | N/A (Unknown)                                                                                                                                                                                                                                                                                              | Probable           | PC                                             |
| 37       | 5 Apr 2005          |                              | 6+(0)               | Butter clams               | Cowichan                                      | 18-7, 18-8                        | Self-harvested (FN)                        | Biomonitored mussels (from area): <44 (Mar 14, Apr 12) (Closed to butter clams)                                                                                                                                                                                                                            | Probable           | [29-31]                                        |
| 38       | 18 Sep 2006         | 4                            | 1(0)                | Crab                       | Tofino                                        | 24-9                              | Self-harvested (fisher)                    | Biomonitored mussels (from area): <42 (Sep 18); (adjacent harvest area 24-8): 44 (Sep 18). (Open to all bivalves except butter clams and scallops)                                                                                                                                                         | Probable           | [32]; FN0868                                   |
| 39       | 25 Sep 2008         | 1                            | 2(0)                | Clams (canned)             | Product of Thailand                           | -                                 | Purchased (retail)                         | Leftover samples: <40 µg/100g                                                                                                                                                                                                                                                                              | Probable           | [33, 34]                                       |
| 40       | 6 Nov 2009          | 0.25                         | 1(0)                | Mussels                    | Tonovin Beach, Tofino (park)                  | 24-8                              | Self-harvested (local campers)             | Biomonitored mussels (from area): 130 (Sep 27); 67 (Oct 4); <44 (Oct 12, 19, Nov 1, 15) (Closed)                                                                                                                                                                                                           | Confirmed          | [35] FN0907                                    |
| 41       | 13 Jun 2010         |                              | 4(0)                | Cockles                    | Bamberton Beach (park)                        | 19-8                              | Self-harvested (campers)                   | Leftover cockles and raw littleneck clams (from area): ,44; biomonitored mussels (from area): <44 (Jun 9, 14); 97 (Jun 22); 410 (Jun 28) (Open to some species: littleneck, manila clams, oysters, mussels. Close to other bivalve species)                                                                | Probable           | Database <sup>A</sup> ; FN0418                 |
| 42       | 29 Sep 2011         | 3 – 96                       | 2(0)                | Mussels                    | Okeover Inlet                                 | 15-4                              | Purchased (retail)                         | Biomonitored mussels (from area): < 40 (Sep 25), 40 (Oct 1); 330 (Oct 8) (Open to all shellfish species except butter clams)                                                                                                                                                                               | Probable           | [36] Database <sup>A</sup> ; FN0926            |
| 43       | 12 Oct 2011         |                              | 1(0)                | Mussels                    | Okeover Inlet                                 | 15-4                              | Purchased (restaurant)                     | Biomonitored mussels (from area): 40 (Oct 1); 330 (Oct 8); 790 (Oct 14) (Open to all shellfish species except butter clams. Closed to all bivalves on Oct 14)                                                                                                                                              | Confirmed          | [36] Database <sup>A</sup> ; FN1005; FN1028    |
| 44       | 17 Jul 2012         |                              | 4(0)                | Manila clams, oysters      | Effingham and Useless Inlets, Sechart Channel | 23-6, 23-8                        | Self-harvested (locals, tourists)          | Biomonitored mussels (from area 23-6): <25 (Jul 10), 120 (Jul 16), 5200 (Jul 17), 62 and 3000 (Jul 19); (from area 23-8): 28 (Jul 8), 34 (Jul 17), <25 (Jul 19) (Open to some species (Jul 5): manila, littleneck clams, oysters, mussels. Closed to other bivalve species. Closed to all species (Jul 18) | Confirmed          | [37]; Database <sup>A-B</sup> ; FN0553, FN0610 |
| 45       | 5 Dec 2013          | 3                            | 1(0)                | Clams                      | Silva Bay, Gabriola Island (park)             | 17-10                             | Self-harvested (boaters)                   | N/A. Self-harvested in Aug, frozen. Biomonitored geoduck: <25 (Apr 21, last sample report for 2013) (Open to some species: littleneck, manila, geoduck, horse clams, oysters, mussels. Closed to other bivalve species)                                                                                    | Probable           | PC; Database <sup>A</sup> ; FN1180             |
| 46       | 18 Jan 2014         | 1                            | 1(0)                | Clams                      | Gabriola Island (park)                        | 17-10                             | Self-harvested (camper)                    | N/A (no biomonitored samples reported for 2014) (Open to some species: manila, littleneck, geoduck, horse clams, oysters mussels. Closed to other bivalve species)                                                                                                                                         | Probable           | PC; FN0040                                     |
| 47       | 18 Mar 2015         |                              | 1(0)                | Clams                      | Haida Gwaii area                              | 2-1                               | Self-harvested                             | Biomonitored mussels: <25 (Jun 5, first test of harvest area that year) (Closed)                                                                                                                                                                                                                           | Probable           | PC; FN0424                                     |
| 48       | 16 May 2015         | 0.25                         | 1(0)                | Mussels                    | Mystic Beach, Juan de Fuca (park)             | 20-4                              | Self-harvested (campers)                   | Beach mussels (from area): <25 (May 26); biomonitored mussels <25 (May 12, May 20) (Open to some species: littleneck, manila clams, oysters, mussels. Closed to other bivalve species)                                                                                                                     | Probable           | PC; Database <sup>A</sup> ; FN0424             |

Table S1. Summary of paralytic shellfish poisoning reports in British Columbia, Canada from 1793-2020

October 2021

| Report # | Date of Consumption | Incubation period range (hr) | No. ill (no. death) | Shellfish species consumed | Location description <sup>a</sup>                      | Harvest Area-Subarea <sup>a</sup> | Self-harvest or consumer Purchase (detail) | Shellfish sample (location) description: STX result as µg STX-eq 100 g <sup>-1</sup> (date) (area was Closed or Open at time of harvesting)                                                                                                           | Probable/confirmed | Source of info                                    |
|----------|---------------------|------------------------------|---------------------|----------------------------|--------------------------------------------------------|-----------------------------------|--------------------------------------------|-------------------------------------------------------------------------------------------------------------------------------------------------------------------------------------------------------------------------------------------------------|--------------------|---------------------------------------------------|
| 49       | 23 May 2015         | 0.5                          | 2(0)                | Mussels and clams          | 2 sources implicated BC and Prince Edward Island (PEI) | 14-8 and PEI                      | Purchased (retail)                         | Biomonitored mussels (from area) <25 (May 18, 25) (Open. Area 14-8 open to all bivalves except butter clams)                                                                                                                                          | Probable           | PC; Database <sup>A</sup> ; FN0451                |
| 50       | 2 Jul 2015          | 1.5                          | 1(0)                | Oysters                    | West Roscoe Bay                                        | 15-5                              | Self-harvested (recreational, boater)      | Biomonitored mussels (from area): <25 (Jun 28, Jul 6). (Open to some species: manila, littleneck clams, oysters, mussels, scallops. Closed to other bivalve species)                                                                                  | Probable           | PC; Database <sup>A</sup> ; FN0610                |
| 51       | 8 May 2016          | 1                            | 1(0)                | Mussels                    | Unknown                                                | Unknown                           | Purchased (restaurant)                     | N/A (Unknown)                                                                                                                                                                                                                                         | Probable           | PC                                                |
| 52       | 10 Jul 2016         | 0.5                          | 2(0)                | Clams                      | Read Island                                            | 13-17                             | Purchased (farmers' market)                | Biomonitored mussels (from area): 120 (Apr 27), 110 (May 5), <25 (Jun 29, Jul 7); biomonitored oysters (from area): <25 (Jun 6) (Open to some species: manila, littleneck, varnish clams, oysters, mussels. Closed to other bivalve species)          | Probable           | PC; FN0635                                        |
| 53       | 5 Sep 2016          | 6.0                          | 4(0)                | Mussels                    | Newfoundland                                           | -                                 | Purchased (restaurant)                     | Same batch (from restaurant): <25 (Open)                                                                                                                                                                                                              | Probable           | Database <sup>B,C</sup>                           |
| 54       | 14 Jan 2017         | 4                            | 1(0)                | Clams                      | BC (Unknown)                                           | Unknown                           | Purchased (retail)                         | N/A (Unknown)                                                                                                                                                                                                                                         | Probable           | PC; Database <sup>C</sup>                         |
| 55       | 24 May 2017         | 1                            | 1(0)                | Clams                      | Rathrevor Beach, Parksville (park)                     | 14-1                              | Self-harvested (local)                     | Biomonitored mussels (from area): <25 (Jun 12, first test of harvest area that year) (Closed)                                                                                                                                                         | Probable           | PC; FN0450                                        |
| 56       | 22 Jun 2017         |                              | 1(0)                | Crab                       | Unknown                                                | Unknown                           | Self-harvested                             | N/A (Unknown)                                                                                                                                                                                                                                         | Probable           | PC                                                |
| 57       | 20 Aug 2017         | 12                           | 1(0)                | Clams                      | Porpoise Bay, Sechelt (park)                           | 16-5                              | Self-harvested                             | Biomonitored geoduck clams (from area): <25 (Jul 21, last date of sampling from this area in 2017); biomonitored mussels (adjacent area 16-6): <25 (Aug 13, Aug 25) (Open to some species: manila, littleneck clams. Closed to other bivalve species) | Probable           | PC; FN0830                                        |
| 58       | 11 Mar 2018         | 3                            | 1(0)                | Oysters                    | Okeover Inlet                                          | 15-4                              | Purchased (retail store)                   | Biomonitored mussels (from area): <25 (Feb 26, Mar 12) (Open to some species: manila, littleneck clams, oysters, scallops. Closed to other bivalve species)                                                                                           | Probable           | PC; FN0176                                        |
| 59       | 20 Jun 2018         | 2.0                          | 4(0)                | Mussels                    | Saanich Inlet                                          | 19-8                              | Self-harvested (FN)                        | Leftover mussels (from soup): 830 (Closed)                                                                                                                                                                                                            | Confirmed          | PC; Database <sup>B,C</sup> ; FN0499              |
| 60       | 15 Sep 2018         | 1.5                          | 2(0)                | Mussels                    | Marina Island and a WA state source                    | 13-15 and WA state                | Purchased (restaurant)                     | Biomonitored mussels (from area): <25 (Sep 9, 16); STX not detected in US source. (Open to some species: manila, littleneck, geoduck and horse clams, oysters, mussels. Closed to other bivalve species)                                              | Probable           | PC; FN1000                                        |
| 61       | 29 Oct 2018         | 0.25                         | 1(0)                | Mussels                    | Sechelt inlet                                          | 16-6                              | Self-harvested (fisher)                    | Leftover mussels (from soup): 20,000; frozen mussels: 15,000 (Closed)                                                                                                                                                                                 | Confirmed          | PC; Database <sup>C</sup> ; FN197                 |
| 62       | 13 Mar 2019         | 1.5                          | 3(0)                | Butter clams               | Dundas Island                                          | 4-1                               | Self-harvested (FN)                        | Leftover butter clams (from 2018 harvest, frozen): 1300 (siphon), 180 (gut) of clams. Urine results: >116 ng STX eq./mL urine and 25 ng STX eq/mL urine (Closed)                                                                                      | Confirmed          | Northern HA notification; Database <sup>B,C</sup> |

Table S1. Summary of paralytic shellfish poisoning reports in British Columbia, Canada from 1793-2020

October 2021

| Report # | Date of Consumption | Incubation period range (hr) | No. ill (no. death) | Shellfish species consumed | Location description <sup>a</sup> | Harvest Area-Subarea <sup>a</sup> | Self-harvest or consumer Purchase (detail) | Shellfish sample (location) description: STX result as µg STX-eq 100 g <sup>-1</sup> (date) (area was Closed or Open at time of harvesting)   | Probable/confirmed | Source of info |
|----------|---------------------|------------------------------|---------------------|----------------------------|-----------------------------------|-----------------------------------|--------------------------------------------|-----------------------------------------------------------------------------------------------------------------------------------------------|--------------------|----------------|
| 63       | 4 Aug 2020          | 0.5                          | 1(0)                | Oysters                    | Saltspring Island                 | 17-9 or 18-7                      | Self-harvested (local)                     | Biomonitored mussels (from 17-9): 78 (Jul 29), <25 (Aug 10); biomonitored mussels (from 18-7): 180 (Jul 30), 85 (Aug 5), 43 (Aug 12) (Closed) | Confirmed          | PC; FN0742     |

<sup>a</sup> – Location descriptions and harvest sub-areas may be visualized on the BCCDC Biotoxin and Sanitary Contamination Closures Map for Shellfish Harvesting in British Columbia at [maps.bccdc.ca/shellfish](https://maps.bccdc.ca/shellfish)  
Databases: A=BCCDC shellfish related illness database (1994-2018); B= Canadian Network for Public Health Intelligence database; C=Panorama database (2016 to present);

PC – BC Drug and Poison Information Centre call records; FN – Fishery Notices from Fisheries and Oceans Canada, [https://notices.dfo-mpo.gc.ca/fns-sap/index-eng.cfm?pg=fishery\\_search&ID=all](https://notices.dfo-mpo.gc.ca/fns-sap/index-eng.cfm?pg=fishery_search&ID=all) to assess area closures <sup>b</sup> – Citations differ, [8] reports a single illness, [7] reports two illnesses.

## REFERENCES

- Quayle, D.B., *Paralytic shellfish poisoning in British Columbia*, in *Bulletin 168*. 1969, Fisheries Research Board of Canada: Nanaimo, BC. p. 68 p.
- Taylor, F.J.R. and P.J. Harrison, *Harmful algal blooms in western Canadian waters*, in *PICES Scientific Report*, F.J.R. Taylor and V.L. Trainer, Editors. 2002. p. 77-88.
- Anderson, L., *Toxic shellfish in British Columbia*. American Journal of Public Health and the Nations Health, 1960. **50**(1): p. 71-83.
- BC Ministry of Environment, *Red tide - what is it all about?*, S.M.a.D. Section, Editor. p. 1-5.
- Heimann, A., et al., *Paralytic shellfish poisoning in British Columbia - Summer 1980*, in *Disease Surveillance*, P.S. Epidemiology, Editor. 1980, BC Ministry of Health. p. 1-6.
- Bell, P., R. Hicks, and J. Millar, *Paralytic shellfish poisoning - Port McNeill area, Vancouver Island, British Columbia*. Canada Diseases Weekly Report, 1985. **11-35**: p. 149-50.
- Todd, E., *Shellfish and fish poisoning in Canada, 1972-1983*. Canada Diseases Weekly Report, 1984. **10-6**: p. 21-24.
- Jackson, K., et al., *Paralytic Shellfish Poisoning - British Columbia*. Canada Diseases Weekly Report, 1976. **2-4**: p. 16.
- Rideout, A., *Paralytic shellfish poisoning - central Vancouver Island health unit*, in *Disease Surveillance*. 1988. p. 176.
- Rideout, A. and E. Todd, *Paralytic shellfish poisoning - British Columbia*. Canada Diseases Weekly Report, 1988. **14-13**: p. 53-55.
- Fisk, B., *FAX Re: PSP Poisonings (Forwarded note from D. Bowering) TO:*, A. Hazelwood, Editor. 1988: Skeena #16, Terrace, BC.
- Stroh, D., D. Bowering, and C.R. Armstrong, *Paralytic shellfish poisoning (PSP)*, in *Disease Surveillance*. 1988, Epidemiology Prevention Services: Victoria, BC. p. 299-301.
- Butter clams confirmed as cause of illness*, in *The Vancouver Sun*. 1988, Postmedia Network Inc.: Canada, Vancouver, B.C. p. A14.
- Copley, B.D. and A. Hazelwood, *A case of paralytic shellfish poisoning*, in *Community and Family Health*. 1989. p. 1.
- Nickel, V., *Report on paralytic shellfish poisoning - butter clams from Clayoquot Sound region*. 1989, Central Vancouver Island health unit. p. p. 3.
- Preston, T., *Oyster complaint - suspected PSP (Letter to J. Pinn, Fisheries & Oceans)*, P.H. Protection, Editor. 1991, Ministry of Health. p. p. 1.
- Todd, E., et al., *An outbreak of sever paralytic shellfish poisoning in British Columbia*. Canada communicable disease report = Releve des maladies transmissibles au Canada, 1993. **19**(13): p. 99-102.
- Werker, D.H., *Update - paralytic shellfish poisoning (FAX) to All health units & Chief Environmental Health Officers*. 1994.
- Oikawa, G., *Briefing note consumer complaint #62-970908-01 possible PSP poisoning (to T. Preston)*. 1997, Canadian Food Inspection Agency: Burnaby, BC.
- Outbreak of shellfish poisoning*, in *Gulf Islands' Island Tides*. 1997.
- Cleverley, B., *Red tide prompts warning*, in *Times Colonist*. 1998: Victoria, BC. p. A6.
- Schallie, K., *PSP illness report Oct 22, 1997 (to S. Liem)*. 1997, Canadian Food Inspection Agency: Burnaby, BC. p. 1 p.
- Schallie, K., *PSP illness report Jan 7, 1998 (to S. Liem)*. 1998, Canadian Food Inspection Agency: Burnaby, BC. p. 1 p.
- Nations, F.a.A.O.o.t.U. *Marine biotoxins, Cases and outbreaks of PSP 2.7.4 North America 2004* [cited 2021 Sep 28]; Available from: <http://www.fao.org/3/y5486e/y5486e0c.htm#bm12>.

25. Canadian Food Inspection Agency, 20030803-Health hazard alert (paralytic shellfish toxins)/Avertissement de danger pour la sante (phycotoxines paralysante). 2003: Ottawa, ON. p. 1.
26. Walton, P., *Fish store fined \$2,000: Sea Drift Market sold red tide clams*, in *Nanaimo Daily News*. 2006, Postmedia Network Inc.: Canada, Nanaimo, B.C. p. A3.
27. Wilson, V., *Shellfish harvester under investigation*, in *Nanaimo Daily News*. 2003, Postmedia Network Inc.: Canada, Nanaimo, B.C. p. A.3.
28. Luba, F., *Nine seek treatment after eating shellfish*, in *The Province*. 2004, Postmedia Network Inc.: Canada, Vancouver, B.C. p. A4.
29. Watts, R., *Two jailed for selling tainted fish*, in *Times-Colonist*. 2007, Postmedia Network Inc.: Canada, Victoria, B.C. p. B5.
30. *Duncan man to face charges of selling illegally caught fish that left two people ill*, in *The Vancouver Sun*. 2005: Canada, Vancouver, B.C.
31. *Charges added in shellfish poisoning*, in *Cowichan News Leader*. 2005, Torstar Syndication Services a Division of Toronto Star Newspapers Limited: Canada, Duncan, B.C. p. 8.
32. Rodriguez-Maynax, L., *PSP report - BC waters (to E. Galanis)*. 2006, Canadian Food Inspection Agency: Burnaby, BC.
33. Mosely, G., *Suspected foodborne intoxication complaint/report*, L. Copeland, Editor. 2008, Interior Health Authority: Cranbrook, BC. p. 3.
34. Hornby, L., *Results for clam product sampled during illness investigation*, G. Mosely, Editor. 2008, Government of Canada: Burnaby, BC. p. 1.
35. Cordner, K., *PSP*, M. Taylor, Editor. 2009, Vancouver Island Health Authority: Courtenay, BC. p. 2.
36. Canadian Food Inspection Agency, 20111015 - HEALTH HAZARD ALERT (Paralytic Shellfish Poisoning) / DANGER POUR LA SANTE (Intoxication par phycotoxine paralysant). 2011, Government of Canada: Ottawa, BC.
37. McIntyre, L. and T. Kosatsky, *Shellfish poisonings in BC: commercial product as source*. BCMJ, 2013. **55**(6): p. 290-91.
